# Supplementary material for: West Nile Virus Seroprevalence in Wild Birds and Equines in Madrid Province, Spain
Source: Preprints.org preprint supplement (doi:10.20944/preprints202404.1696.v1), 2024-04-26
Supplement: Supplementary file 1 [file supplementary]

**Table S1**: WNV detection records recovered from class Aves, using PCR and sequencing (PCR), serum neutralization (VNT) or competitive Enzyme Linked Immuno-Assay (cELISA). WNV, or WN antibodies, has been detected from at least 69 bird species, from 29 families and 16 orders in Spain. Detections have occurred in the following autonomous communities: Andalusia (A), Canary Islands (CI), Castilla La Mancha (CLM), Catalonia (C) and Extremadura (E).

| **Class** | **Family** | **Species** | **Common name** | **Autonomous Community** | **Method** | **Reference** |
| --- | --- | --- | --- | --- | --- | --- |
| Accipitriformes | Accipitridae | *Accipiter gentilis* | Goshawk | A, C | PCR, VNT | 66,26,18 |
| *Accipiter nisus* | Sparrowhawk | C, E | cELISA, VNT | 67,39 |
| *Aegypius monachus* | Black vulture | A, E | cELISA, VNT | 39,71 |
| *Aquila adalberti* | Spanish imperial eagle | A | cELISA, VNT | 71 |
| *Aquila chrysaetos* | Golden eagle | A, CLM, E | cELISA, PCR, VNT | 67,16 |
| *Aquila fasciatus* | Bonelli's eagle | A, CLM, C | cELISA, VNT, PCR | 71,16,32 |
| *Buteo buteo* | Buzzard | C, E | cELISA, VNT | 39,32 |
| *Circaetus gallicus* | Short-toed snake eagle | A, C, E | cELISA, VNT | 67,39,16 |
| *Circus aeruginosus* | Marsh harrier | E | cELISA, VNT | 39 |
| *Circus cyaneus* | Hen harrier | C | cELISA, VNT | 67 |
| *Circus pygargus* | Montagu's harrier | A, E | cELISA, VNT | 39,71,16,30 |
| *Gypaetus barbatus* | Bearded vulture | C | VNT | 32 |
| *Gyps fulvus* | Griffon vulture | A | cELISA, VNT | 72 |
| *Hieraaetus pennatus* | Booted eagle | A | cELISA, VNT | 72,30,73 |
| *Milvus migrans* | Black kite | A, C, E | cELISA, VNT | 67,39,71,72 |
| *Milvus milvus* | Red kite | C, E | cELISA, VNT | 67,39,32 |
| *Neophron percnopterus* | Egyptian vulture | A | cELISA | 71 |
| *Pernis apivorus* | Honey buzzard | C, E | cELISA, VNT | 67,39,32 |
| Anseriformes | Anatidae | *Anas platyrhynchos* | Mallard | A | cELISA, VNT | 30,18 |
| *Anser anser* | Greylag geese | A | cELISA, VNT | 30 |
| *Chen canagica* | Emperor goose | A | cELISA, VNT | 68 |
| *Marmoronetta angustirostris* | Marbled duck | A | VNT | 18 |
| Bucerotiformes | Upupidae | *Upupa epops* | Hoopoe | A | cELISA, VNT | 47 |
| Caprimulgiformes | Caprimulgidae | *Caprimulgus ruficollis* | Red-necked nightjar | C | cELISA, VNT | 67 |
| Charadriiformes | Laridae | *Larus fuscus* | Lesser black-backed gull | A | cELISA, VNT | 72 |
| *Larus michahellis* | Yellow-legged gull | A, C | cELISA, VNT | 67,69 |
| Ciconiformes | Ciconiidae | *Ciconia ciconia* | White stork | A, C, E | cELISA, VNT | 67,39,68,18,32 |
| *Ciconia nigra* | Black stork | E | cELISA, VNT | 39 |
| Columbiformes | Columbidae | *Columba palumbus* | Wood pigeon | C | VNT | 32 |
| *Columbia livia* | Rock dove | A, C | cELISA, VNT | 68,32 |
| Falconiformes | Falconidae | *Falco eleonorae* | Eleanora's falcon | CI | VNT | 70 |
| *Falco naumanni* | Lesser kestrel | A | VNT | 18 |
| *Falco subbuteo* | Eurasian hobby | C | cELISA, VNT | 39 |
| *Falco tinnunculus* | Kestrel | A, C, E | cELISA, VNT | 67,39,18,32 |
| Galliformes | Phasianidae | *Alectoris rufa* | Red-legged partridge | A, C | cELISA, VNT | 19,32 |
| *Gallus gallus* | Domestic fowl | C | VNT | 32 |
| *Phasianus colchicus* | Pheasant | A | cELISA, VNT | 19 |
| Gruiformes | Rallidae | *Fulica atra* | Common coot | A | cELISA, VNT | 11,71,18 |
| Otidiformes | Otididae | *Otis tarda* | Great bustard | A, E | cELISA | 39,71 |
| Passeriformes | Acrocephalidae | *Acrocephalus scirpaceus* | Eurasian reed warbler | A | cELISA, VNT | 47 |
| Cettidae | *Cettia cetti* | Cetti's warbler | E | cELISA, VNT | 66 |
| Corvidae | *Corvus corax* | Common raven | C, E | cELISA, VNT | 39,32 |
| *Cyanopica cyanus* | Azure-winged magpie | A | cELISA, VNT | 47 |
| *Pica pica* | Common magpie | CLM, C | cELISA, PCR, VNT | 16,75,32 |
| Estrildidae | *Amandava amandava* | Red avadavat | E | cELISA, VNT | 17 |
| *Estrilda astrild* | Common waxbill | E | cELISA | 17 |
| Hirundidae | *Delichon urbicum* | House martin | E | cELISA, VNT | 39,17 |
| Lanidae | *Lanius senator* | Woodchat shrike | A | VNT | 73 |
| Motacillidae | *Motacilla flava* | Western yellow wagtail | A | cELISA, VNT | 47 |
| Muscicapidae | *Erithracus rubecula* | European robin | E | cELISA | 66 |
| *Phoenicurus ochrurus* | Black redstart | A | VNT | 73 |
| *Phoenicurus phoenicurus* | Common redstart | A | cELISA, VNT | 47 |
| Passeridae | *Passer domesticus* | House sparrow | A, E | cELISA, VNT | 74,17 |
| Ploceidae | *Euplectes afer* | Yellow-crowned bishop | E | cELISA | 17 |
| Sylviidae | *Sylvia borin* | Garden warbler | A | VNT | 73 |
| *Sylvia melanocephala* | Sardinian warbler | A, E | cELISA, VNT | 47,17 |
| Turdidae | *Turdus merula* | Blackbird | A | cELISA, VNT | 47,73 |
| Pelecaniformes | Ardeidae | *Ardea cinerea* | Grey heron | C, E | cELISA, VNT | 67,39 |
| *Bubulcus ibis* | Western cattle egret | A | VNT | 18 |
| *Egretta garzetta* | Little egret | C | cELISA | 67 |
| Threskiornithidae | *Platalea leucorodia* | Spoonbill | A | cELISA | 71 |
| *Plegadis falcinellus* | Glossy ibis | A | VNT | 69 |
| Phoenicopteriformes | Phoenicopteridae | *Phoenicopterus ruber* | Greater flamingo | A | VNT | 69 |
| Strigiformes | Strigidae | *Asio otus* | Long-eared owl | A, C | cELISA, VNT | 67,30 |
| *Bubo bubo* | Eagle owl | A, E | cELISA, VNT | 39,72,30,18 |
| *Otus scops* | Eurasian scops owl | A, C | cELISA, VNT | 39,30 |
| *Strix aluco* | Tawny owl | A, C, E | cELISA, VNT | 67,39,72,18 |
| Tytonidae | *Tyto alba* | Barn owl | A, C, E | cELISA, VNT | 67,39,72 |
| Struthiorniformes | Struthionidae | *Struthio camelus* | Ostrich | A | cELISA | 68 |

NOTE: This list represents a fraction of the available literature, suggesting that the actual number of relevant studies is higher.
